# Supplementary material for: Discovering and Constructing ceRNA-miRNA-Target Gene Regulatory Networks during Anther Development in Maize
Source: MDPI journal article supplement (doi:10.3390/ijms20143480), 2019-07-15
Supplement: s1 [file s1]

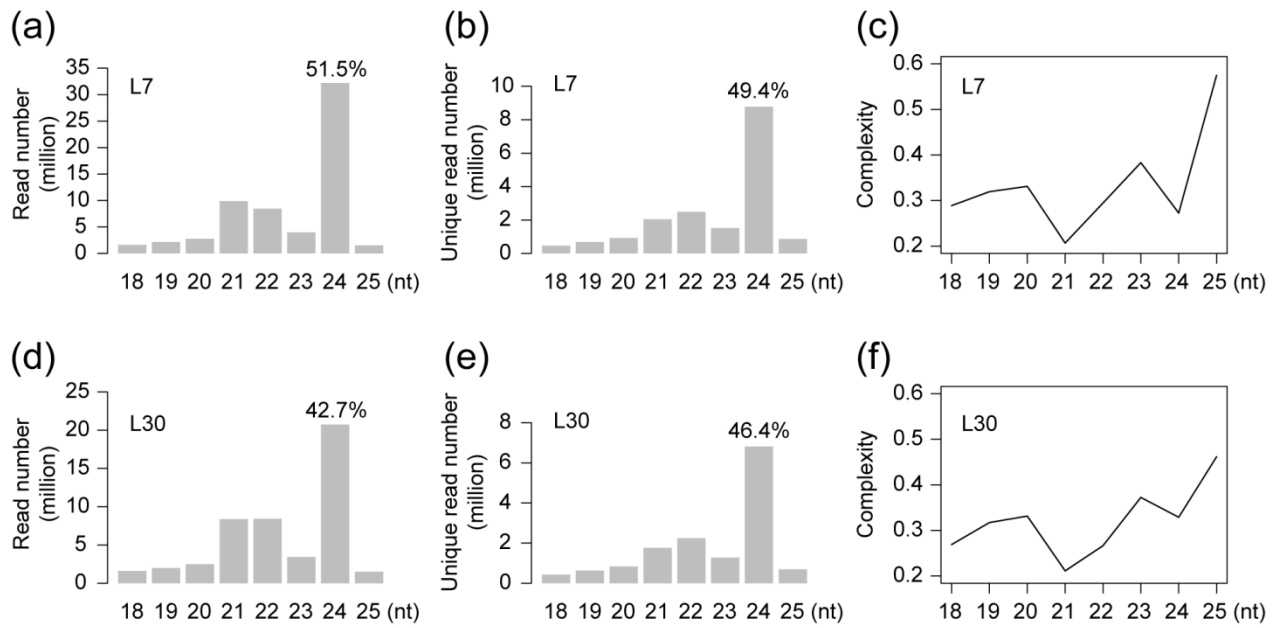

**Figure S1. Length distribution of reads in the small RNA-seq data of maize lines L7 and L30.**

We estimated both the numbers of all reads (**a** and **d**) and the unique reads (**b** and **e**) ranging from 18 to 25 nt in length. “Complexity” (**c** and **f**) was the ratio between the number of unique reads and the number of all reads for each length class.
