# Supplementary material for: Discovering and Constructing ceRNA-miRNA-Target Gene Regulatory Networks during Anther Development in Maize
Source: MDPI journal article supplement (doi:10.3390/ijms20143480), 2019-07-15
Supplement: s1 [file s1]

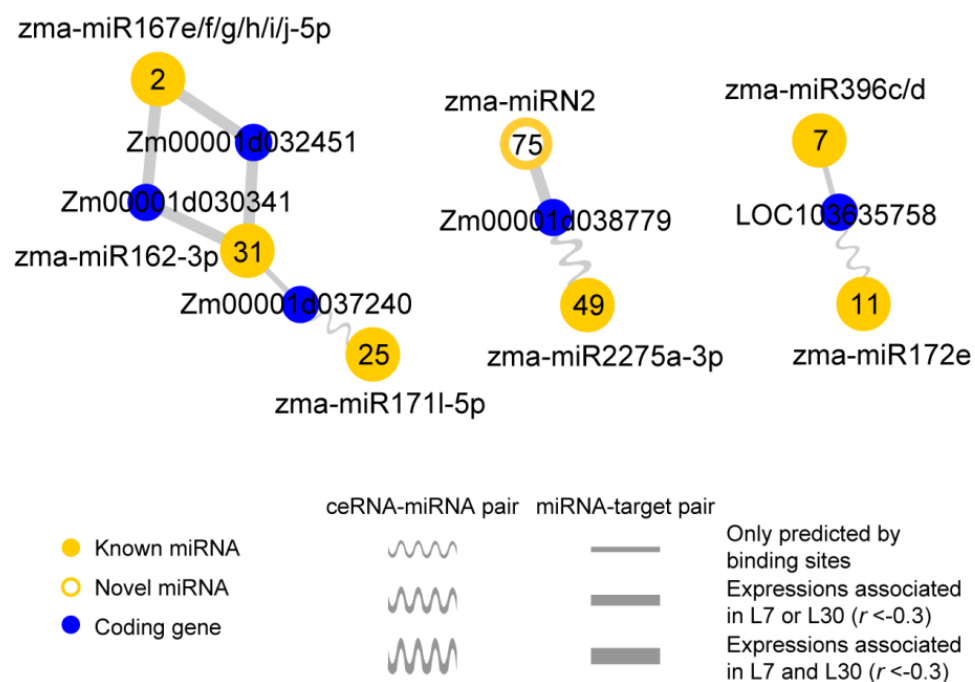

**Figure S4. The relatively simple crosstalk between reconstructed ceRNA-miRNA-target gene regulatory networks.**

Numbers in the yellow dots and circles represent known and potential novel miRNAs numbered in Figure 4.
