# Supplementary material for: Discovering and Constructing ceRNA-miRNA-Target Gene Regulatory Networks during Anther Development in Maize
Source: MDPI journal article supplement (doi:10.3390/ijms20143480), 2019-07-15
Supplement: s1 [file s1]

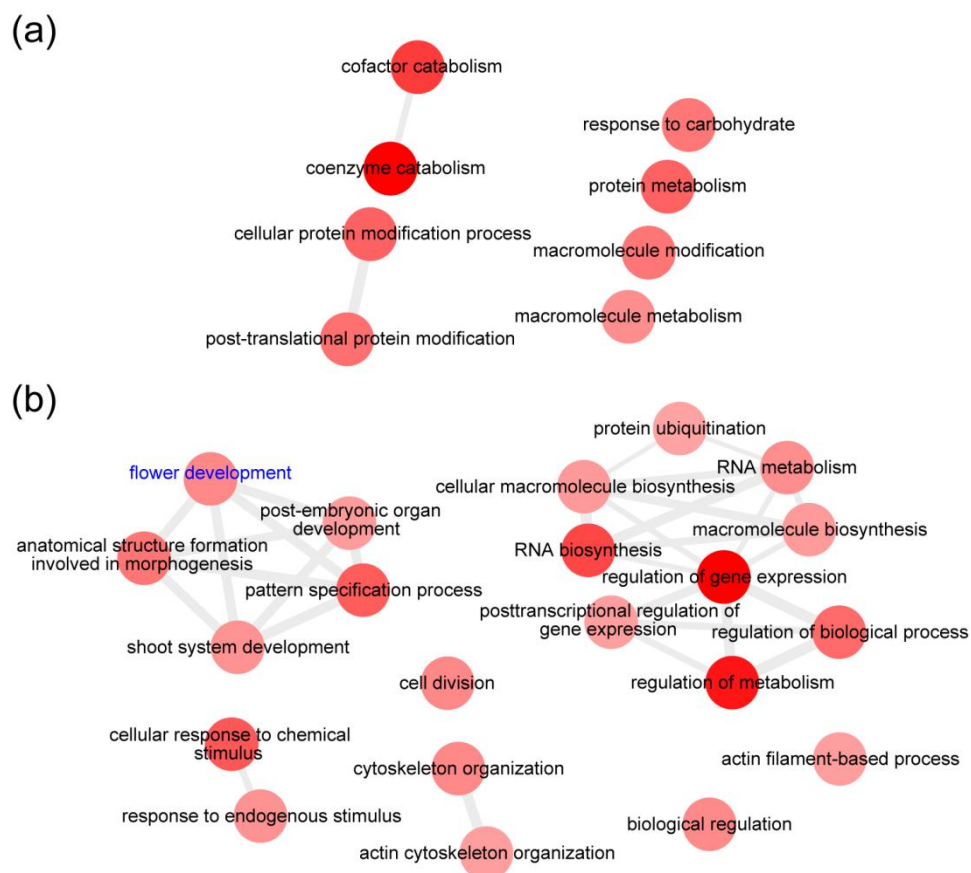

### Figure S2. GO enrichment analysis.

Results of **a** ceRNAs and **b** target genes in “biological process” category were shown. GO term of “flower development” was shown in blue. REVIGO (<http://revigo.irb.hr/>) was used to remove redundancy in GO terms.
