# Supplementary material for: Discovering and Constructing ceRNA-miRNA-Target Gene Regulatory Networks during Anther Development in Maize
Source: MDPI journal article supplement (doi:10.3390/ijms20143480), 2019-07-15
Supplement: s1 [file s1]

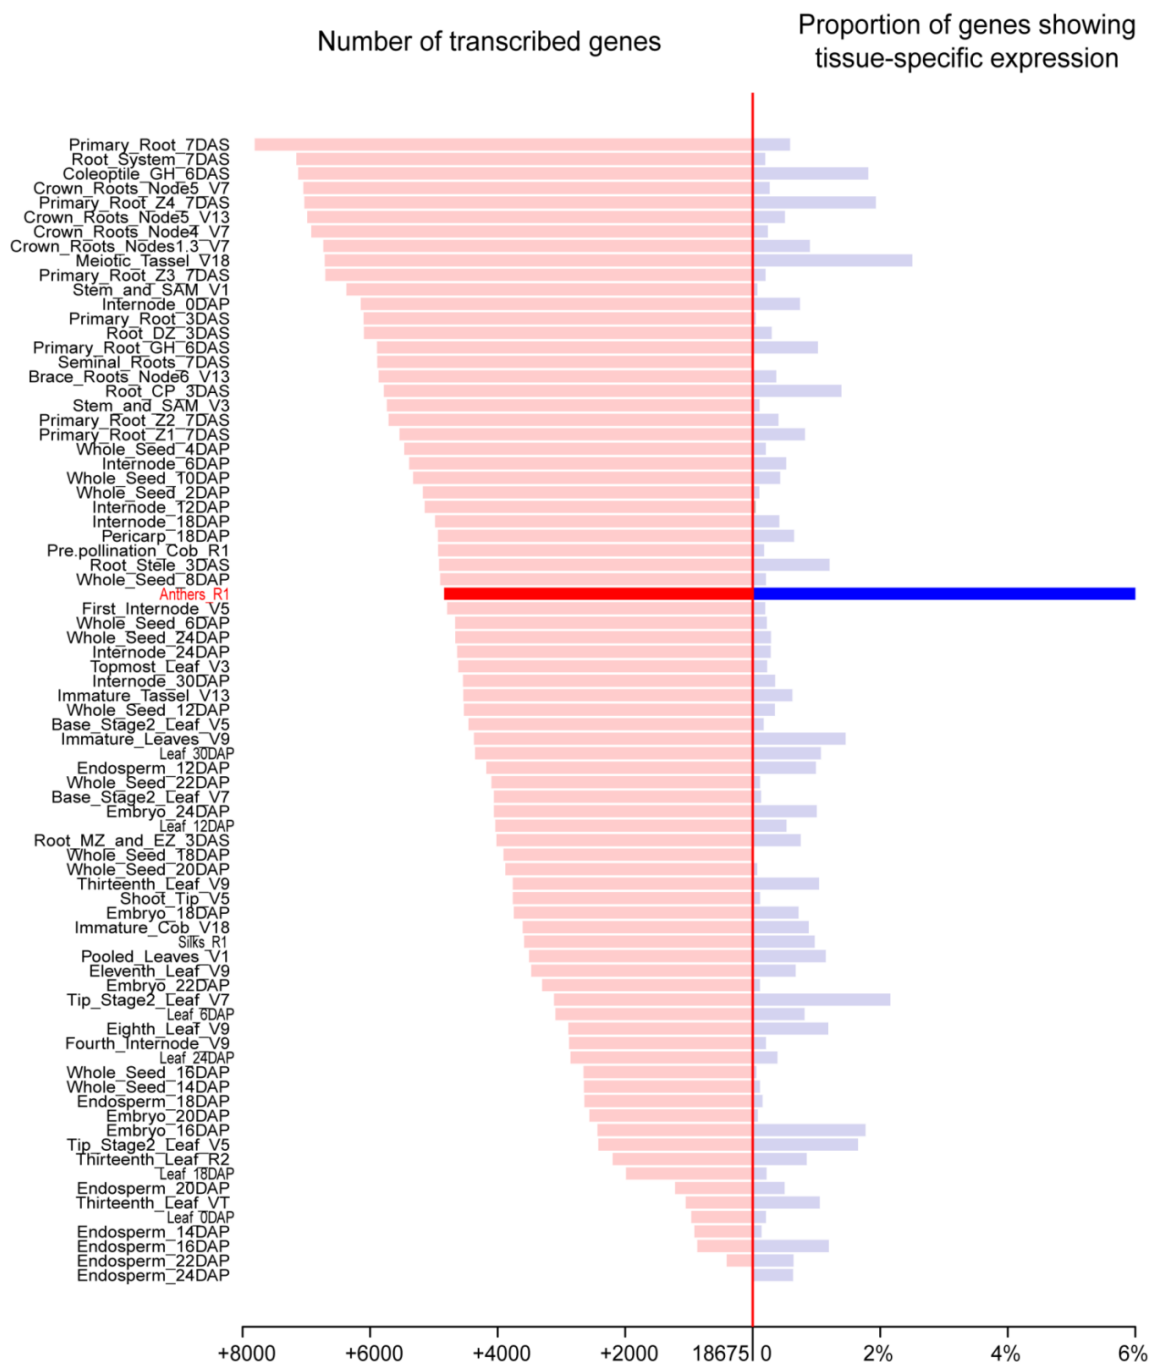

**Figure S6. Proportions of transcribed genes that show tissue-specificity in maize transcriptomes.**

The left part of the figure shows the numbers of transcribed genes in different maize tissues at various time points, while the right part shows the proportion of tissue-specific transcribed genes in the total number of transcribed genes for each tissue. There were ~23,000 transcribed genes (marked in dark red) in the anther transcriptomes and ~6% of them (marked in dark blue) were specifically transcribed in the anther. This proportion was the highest among the 79 tissues sampled at different developmental stages.
